# Supplementary material for: Encapsulating NiCo2O4 inside metal–organic framework sandwiched graphene oxide 2D composite nanosheets for high-performance lithium-ion batteries
Source: Royal Society of Chemistry journal article supplement (doi:10.1039/c9nr02787d), 2019-01-01
Supplement: c9nr02787d1.pdf [file c9nr02787d1.pdf]

## Supporting Information

Encapsulating  $\text{NiCo}_2\text{O}_4$  inside metal-organic framework sandwiched graphene oxide

2D composite nanosheets for high-performance lithium-ion batteries

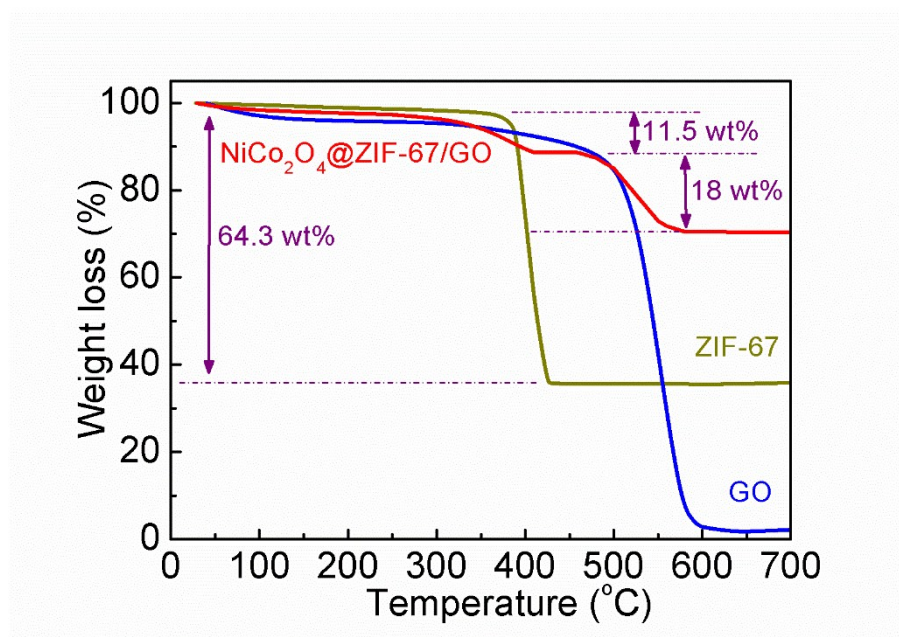

**Figure S1.** TGA curves of the as-prepared  $\text{NiCo}_2\text{O}_4@ZIF-67/GO$ , ZIF-67 and GO.

TGA analysis was carried out from room temperature to 700 °C at a heating rate of 10 °C  $\text{min}^{-1}$  in air.

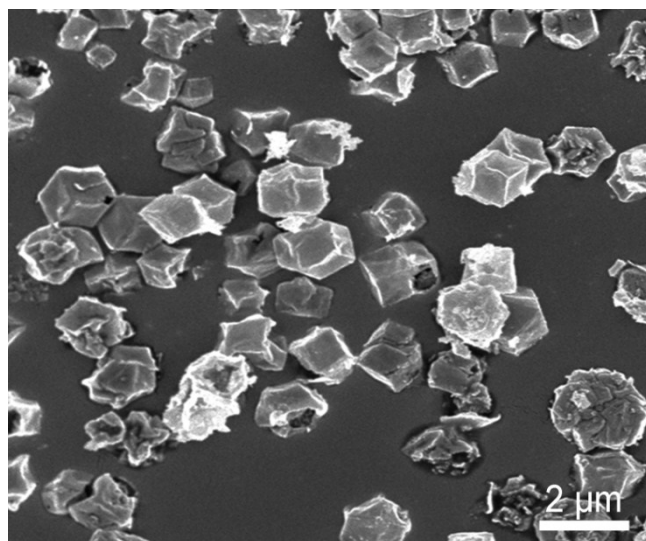

**Figure S2.** SEM image of the as-prepared NiCo<sub>2</sub>O<sub>4</sub>@ZIF-67.

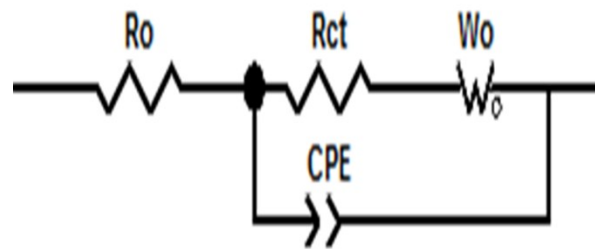

**Figure S3.** Electrical equivalent circuit for fitting the impedance spectra.
